# Supplementary material for: A Follow-up Study on Visual Display Terminal Use and Dry Eye Disease in the Beijing Adult Dry Eye Cohort Study (ADEC)
Source: Research Square preprint supplement (doi:10.21203/rs.3.rs-6939028/v1), 2025-07-22
Supplement: Supplementary file 1 [file 637b6f787e0b899e68a73bb5.xlsx]

## Sheet: Sheet1
Table 2. Change of Dry Eye and Non-Dry Eye Status Before and After Follow-Up
Baseline/Follow-up	Non-dry eye	Dry eye	Total
non-dry eye	1243	127	1370
Dry eye	165	543	708
Total	1408	670	2078
