# Supplementary material for: A Follow-up Study on Visual Display Terminal Use and Dry Eye Disease in the Beijing Adult Dry Eye Cohort Study (ADEC)
Source: Research Square preprint supplement (doi:10.21203/rs.3.rs-6939028/v1), 2025-07-22
Supplement: Supplementary file 2 [file 7f6c2a723b30238778f3fb4f.xlsx]

## Sheet: Sheet1
Table1. The prevalence of dry eye disease before and after follow-up in different groups
Frequency of VDT use	N(eyes)	Dry eye	Non-dry eye	c2	P	Dry eye	Non-dry eye	c2	P
		(baseline)	(baseline)			(follow-up)	(follow-up)
Total	2078	708(34.1%)	1370(65.9%)			670(32.2%)	1408(67.8%)
T1 High- group	1505(72.4%)	571(37.9%)	934(62.1%)	51.04	＜0.001	533(35.4%)	972(64.6%)	36.17	＜0.001
T2 Medium-group	198(9.5%)	68(34.3%)	130(65.7%)			65(32.8%)	133(67.2%)
T3 Low-group	375(18.0%)	69(18.4%)	306(81.6%)			72(19.2%)	303(80.8%)
