# Supplementary material for: A Follow-up Study on Visual Display Terminal Use and Dry Eye Disease in the Beijing Adult Dry Eye Cohort Study (ADEC)
Source: Research Square preprint supplement (doi:10.21203/rs.3.rs-6939028/v1), 2025-07-22
Supplement: Supplementary file 3 [file 8eaf4048997198ba20254671.xlsx]

## Sheet: Sheet1
Table 4. Changes in the proportion of adults with different degrees of dry Eye
Baseline/Follow-up		Normal	Mild dry eye	Moderate dry eye	Severe dry eye	Total	c2	P
T1	Normal	806	83	19	6	914	1721.25	＜0.001
	Mild dry eye	83	268	28	16	395
	Moderate dry eye	26	20	84	6	136
	Severe dry eye	4	2	12	42	60
	Total	919	373	143	70	1505
T2	Normal	122	6	0	0	128	326.32	＜0.001
	Mild dry eye	4	36	2	0	42
	Moderate dry eye	0	4	10	2	16
	Severe dry eye	2	0	2	8	12
	Total	128	46	14	10	198
T3	Normal	282	15	5	0	302	405.53	＜0.001
	Mild dry eye	14	50	1	0	65
	Moderate dry eye	0	0	8	0	8
	Severe dry eye	0	0	0	0	0
	Total	296	65	14	0	375
Total	Normal	1210	104	24	6	1344	2546.3	＜0.001
	Mild dry eye	101	354	31	16	502
	Moderate dry eye	26	24	102	8	160
	Severe dry eye	6	2	14	50	72
	Total	1343	484	171	80	2078
