# Supplementary material for: A Follow-up Study on Visual Display Terminal Use and Dry Eye Disease in the Beijing Adult Dry Eye Cohort Study (ADEC)
Source: Research Square preprint supplement (doi:10.21203/rs.3.rs-6939028/v1), 2025-07-22
Supplement: Supplementary file 4 [file c9a3d3ea2d012bcebab4f4ec.xlsx]

## Sheet: Sheet1
Table 3. Changes in dry eye and non-dry eye status before and after follow-up in different VDT frequency groups
Baseline/Follow-up	Non-dry eye		Dry eye		c2	P
T1					651.407	＜0.001
non-dry eye		833		101
Dry eye		139		432
T2					136.635	＜0.001
non-dry eye		124		6
Dry eye		9		59
T3					198.628	＜0.001
non-dry eye		286		20
Dry eye		17		52
