# Supplementary material for: A Follow-up Study on Visual Display Terminal Use and Dry Eye Disease in the Beijing Adult Dry Eye Cohort Study (ADEC)
Source: Research Square preprint supplement (doi:10.21203/rs.3.rs-6939028/v1), 2025-07-22
Supplement: Supplementary file 5 [file e720addf8c497922f3f4355a.xlsx]

## Sheet: Sheet1
Table 5. Correlation of ocular indicators before and after follow-up
Total	OSDI	TMH	NIBUTF	NIBUTAV	CFS	Upper MG assessment	Lower MG assessment
		(mm)	(s)	(s)	score
Total
Baseline	10.72±9.32	0.186±0.074	10.44±4.61	11.96±4.25	0.51±1.20	1.60±0.60	1.81±0.76
Follow-up	10.78±9.72	0.185±0.075	10.96±4.55	12.05±4.51	0.82±1.50	1.54±0.61	1.74±0.74
Z	-0.281	0.039	-6.802	-8.627	-6.006	-5.852	-4.875
P	0.779	0.969	＜0.001	＜0.001	＜0.001	＜0.001	＜0.001
T1
Baseline	11.89±9.61	0.183±0.074	9.91±4.43	11.51±4.13	0.51±1.27	1.61±0.61	1.84±0.763
Follow-up	11.81±10.12	0.182±0.073	10.50±4.37	11.63±4.34	0.81±1.45	1.54±0.61	1.76±0.748
Z	-0.691	-0.209	-6.478	-6.98	-5.675	-4.947	-4.585
P	0.49	0.834	＜0.001	＜0.001	＜0.001	＜0.001	＜0.001
T2
Baseline	10.92±9.63	0.186±0.08	10.59±5.11	12.09±4.61	0.49±0.85	1.60±0.62	1.85±0.76
Follow-up	10.90±9.71	0.183±0.08	11.13±4.90	12.16±4.83	1.31±2.29	1.57±0.64	1.82±0.78
Z	-0.14	-0.868	-1.783	-3.471	-0.798	-0.678	-1.59
P	0.889	0.386	0.075	＜0.001	0.425	0.498	0.112
T3
Baseline	5.89±5.77	0.198±0.070	12.49±4.46	13.71±4.04	0.51±0.94	1.54±0.56	1.69±0.725
Follow-up	6.57±6.44	0.198±0.082	12.70±4.66	13.70±4.61	0.70±1.33	1.51±0.59	1.60±0.693
Z	-2.674	-0.14	-1.625	-3.952	-1.986	-3.464	-1.139
P	0.008	0.888	0.104	＜0.001	0.047	＜0.001	0.255
